# Supplementary material for: Biobased plastic: A plausible solution to carbon neutrality in plastic industry
Source: Research Square preprint supplement (doi:10.21203/rs.3.rs-896313/v1), 2021-09-20
Supplement: Supplementary file 4 [file c69a5ad9efa94bdce953a10e.xlsx]

## Sheet: EmissionFactor
Plastics Combustion Net Emission Factor
Material	Carbon Content (%)	Combustion Efficiency (%)	CO2 Emission (CO2E Ton)
HDPE	86	98	1.3956
LDPE, LLDPE	86	98	1.3956
PET	63	98	1.36264
PP	86	98	1.3956
PS	92	98	1.8022
PVC	38	98	0.736264
PUR	65	98	1.35
Other	80	98	1.39
Plastics CO2 Emission for Virgin Production
Material	Process Energy	Transportation Energy	Process Non- Energy	CO2 Emission (CO2E Ton)
HDPE	1.19	0.19	0.2	1.73626
LDPE, LLDPE	1.4	0.19	0.21	1.97802
PET	1.75	0.11	0.39	2.47253
PP	1.17	0.17	0.21	1.7033
PS	1.87	0.18	0.45	2.74725
PVC	1.69	0.12	0.14	2.14286
PUR	1.75	0.11	0.39	2.47253
Other	1.75	0.11	0.39	2.47253
Plastics CO2 Emission for Recycled Production
Material	Process Energy	Transportation Energy	Process Non- Energy	CO2 Emission (CO2E Ton)
HDPE	0.35	0.19	0	0.593407
LDPE, LLDPE	-	-	-	-
PET	0.77	0.21	0	1.07692
PP	-	-	-	0.57
PS	-	-	-	-
PVC	-	-	-	-
PUR	-	-	-	-
Other	-	-	-	-
Plastics CO2 Emission for Landfill
Material	Process Energy	Transportation Energy	Process Non- Energy	CO2 Emission (CO2E Ton)
HDPE	0	0.04	0	0.043956
LDPE	0	0.04	0	0.043956
PET	0	0.04	0	0.043956
LLDPE	0	0.04	0	0.043956
PP	0	0.04	0	0.043956
PS	0	0.04	0	0.043956
PVC	0	0.04	0	0.043956
PUR	0	0.04	0	0.043956

## Sheet: PlasticType
Market Sector	LDPE, LLDPE	HDPE	PP	PS	PVC	PET	PUR	Other	Total
Transportation	0.00085	0.006375	0.0221	8.5e-05	0.00289	8.5e-05	0.013175	0.0119	0.05746
Packaging	0.11475	0.07905	0.0697	0.01955	0.00765	0.08585	0.0017	0.00085	0.3791
Building and Construction	0.00935	0.02805	0.0102	0.0187	0.06885	8.5e-05	0.0204	0.00391	0.159545
Electrical/Electronic	0.00425	0.001445	0.00731	0.00493	0.00306	8.5e-05	0.00306	0.0085	0.03264
Consumer & Institutional Products	0.02465	0.01445	0.0323	0.0153	0.00459	8.5e-05	0.0085	0.00136	0.101235
Industrial Machinery	0.00153	0.00085	0.1516	8.5e-05	8.5e-05	8.5e-05	0.002465	8.5e-05	0.156785
Other	0.01445	0.00765	0.0357	0.006205	0.0119	8.5e-05	0.02159	0.014535	0.112115
Total	0.16983	0.13787	0.32891	0.064855	0.099025	0.08636	0.07089	0.04114	0.99888

## Sheet: Lifetime
Market Sector	Mean	SD
Transportation	13	3
Packaging	0.5	0.1
Building and Construction	35	7
Electrical/Electronic	8	2
Consumer & Institutional Products	3	1
Industrial Machinery	20	3
Other	5	1.5
Textiles	5	1.5

## Sheet: WasteSenario1
No.	Year	Recycled	Incinerated	Discard
0	1950	0	0	1
1	1951	0	0	1
2	1952	0	0	1
3	1953	0	0	1
4	1954	0	0	1
5	1955	0	0	1
6	1956	0	0	1
7	1957	0	0	1
8	1958	0	0	1
9	1959	0	0	1
10	1960	0	0	1
11	1961	0	0	1
12	1962	0	0	1
13	1963	0	0	1
14	1964	0	0	1
15	1965	0	0	1
16	1966	0	0	1
17	1967	0	0	1
18	1968	0	0	1
19	1969	0	0	1
20	1970	0	0	1
21	1971	0	0	1
22	1972	0	0	1
23	1973	0	0	1
24	1974	0	0	1
25	1975	0	0	1
26	1976	0	0	1
27	1977	0	0	1
28	1978	0	0	1
29	1979	0	0	1
30	1980	0	0.007	0.993
31	1981	0	0.014	0.986
32	1982	0	0.021	0.979
33	1983	0	0.028	0.972
34	1984	0	0.035	0.965
35	1985	0	0.042	0.958
36	1986	0	0.049	0.951
37	1987	0	0.056	0.944
38	1988	0	0.063	0.937
39	1989	0	0.07	0.93
40	1990	0.007	0.077	0.916
41	1991	0.014	0.084	0.902
42	1992	0.021	0.091	0.888
43	1993	0.028	0.098	0.874
44	1994	0.035	0.105	0.86
45	1995	0.042	0.112	0.846
46	1996	0.049	0.119	0.832
47	1997	0.056	0.126	0.818
48	1998	0.063	0.133	0.804
49	1999	0.07	0.14	0.79
50	2000	0.077	0.147	0.776
51	2001	0.084	0.154	0.762
52	2002	0.091	0.161	0.748
53	2003	0.098	0.168	0.734
54	2004	0.105	0.175	0.72
55	2005	0.112	0.182	0.706
56	2006	0.119	0.189	0.692
57	2007	0.126	0.196	0.678
58	2008	0.133	0.203	0.664
59	2009	0.14	0.21	0.65
60	2010	0.147	0.217	0.636
61	2011	0.154	0.224	0.622
62	2012	0.161	0.231	0.608
63	2013	0.168	0.238	0.594
64	2014	0.175	0.245	0.58
65	2015	0.182	0.252	0.566
66	2016	0.189	0.259	0.552
67	2017	0.196	0.266	0.538
68	2018	0.203	0.273	0.524
69	2019	0.21	0.28	0.51
70	2020	0.217	0.287	0.496
71	2021	0.224	0.294	0.482
72	2022	0.224	0.301	0.475
73	2023	0.224	0.308	0.468
74	2024	0.224	0.315	0.461
75	2025	0.224	0.322	0.454
76	2026	0.224	0.329	0.447
77	2027	0.224	0.336	0.44
78	2028	0.224	0.343	0.433
79	2029	0.224	0.35	0.426
80	2030	0.224	0.357	0.419
81	2031	0.224	0.364	0.412
82	2032	0.224	0.371	0.405
83	2033	0.224	0.378	0.398
84	2034	0.224	0.385	0.391
85	2035	0.224	0.392	0.384
86	2036	0.224	0.399	0.377
87	2037	0.224	0.406	0.37
88	2038	0.224	0.413	0.363
89	2039	0.224	0.42	0.356
90	2040	0.224	0.427	0.349
91	2041	0.224	0.434	0.342
92	2042	0.224	0.441	0.335
93	2043	0.224	0.448	0.328
94	2044	0.224	0.455	0.321
95	2045	0.224	0.462	0.314
96	2046	0.224	0.469	0.307
97	2047	0.224	0.476	0.3
98	2048	0.224	0.483	0.293
99	2049	0.224	0.49	0.286
100	2050	0.224	0.497	0.279
101	2051	0.224	0.504	0.272
102	2052	0.224	0.511	0.265
103	2053	0.224	0.518	0.258
104	2054	0.224	0.525	0.251
105	2055	0.224	0.532	0.244
106	2056	0.224	0.539	0.237
107	2057	0.224	0.546	0.23
108	2058	0.224	0.553	0.223
109	2059	0.224	0.56	0.216
110	2060	0.224	0.567	0.209

## Sheet: WasteSenario2
No.	Year	Recycled	Incinerated	Discard
0	1950	0	0	1
1	1951	0	0	1
2	1952	0	0	1
3	1953	0	0	1
4	1954	0	0	1
5	1955	0	0	1
6	1956	0	0	1
7	1957	0	0	1
8	1958	0	0	1
9	1959	0	0	1
10	1960	0	0	1
11	1961	0	0	1
12	1962	0	0	1
13	1963	0	0	1
14	1964	0	0	1
15	1965	0	0	1
16	1966	0	0	1
17	1967	0	0	1
18	1968	0	0	1
19	1969	0	0	1
20	1970	0	0	1
21	1971	0	0	1
22	1972	0	0	1
23	1973	0	0	1
24	1974	0	0	1
25	1975	0	0	1
26	1976	0	0	1
27	1977	0	0	1
28	1978	0	0	1
29	1979	0	0	1
30	1980	0	0.007	0.993
31	1981	0	0.014	0.986
32	1982	0	0.021	0.979
33	1983	0	0.028	0.972
34	1984	0	0.035	0.965
35	1985	0	0.042	0.958
36	1986	0	0.049	0.951
37	1987	0	0.056	0.944
38	1988	0	0.063	0.937
39	1989	0	0.07	0.93
40	1990	0.007	0.077	0.916
41	1991	0.014	0.084	0.902
42	1992	0.021	0.091	0.888
43	1993	0.028	0.098	0.874
44	1994	0.035	0.105	0.86
45	1995	0.042	0.112	0.846
46	1996	0.049	0.119	0.832
47	1997	0.056	0.126	0.818
48	1998	0.063	0.133	0.804
49	1999	0.07	0.14	0.79
50	2000	0.077	0.147	0.776
51	2001	0.084	0.154	0.762
52	2002	0.091	0.161	0.748
53	2003	0.098	0.168	0.734
54	2004	0.105	0.175	0.72
55	2005	0.112	0.182	0.706
56	2006	0.119	0.189	0.692
57	2007	0.126	0.196	0.678
58	2008	0.133	0.203	0.664
59	2009	0.14	0.21	0.65
60	2010	0.147	0.217	0.636
61	2011	0.154	0.224	0.622
62	2012	0.161	0.231	0.608
63	2013	0.168	0.238	0.594
64	2014	0.175	0.245	0.58
65	2015	0.182	0.252	0.566
66	2016	0.189	0.259	0.552
67	2017	0.196	0.266	0.538
68	2018	0.203	0.273	0.524
69	2019	0.21	0.28	0.51
70	2020	0.217	0.287	0.496
71	2021	0.224	0.294	0.482
72	2022	0.231	0.301	0.468
73	2023	0.238	0.308	0.454
74	2024	0.245	0.315	0.44
75	2025	0.252	0.322	0.426
76	2026	0.259	0.329	0.412
77	2027	0.266	0.336	0.398
78	2028	0.273	0.343	0.384
79	2029	0.28	0.35	0.37
80	2030	0.287	0.357	0.356
81	2031	0.294	0.364	0.342
82	2032	0.301	0.371	0.328
83	2033	0.308	0.378	0.314
84	2034	0.315	0.385	0.3
85	2035	0.322	0.392	0.286
86	2036	0.329	0.399	0.272
87	2037	0.336	0.406	0.258
88	2038	0.343	0.413	0.244
89	2039	0.35	0.42	0.23
90	2040	0.357	0.427	0.216
91	2041	0.364	0.434	0.202
92	2042	0.371	0.441	0.188
93	2043	0.378	0.448	0.174
94	2044	0.385	0.455	0.16
95	2045	0.392	0.462	0.146
96	2046	0.399	0.469	0.132
97	2047	0.406	0.476	0.118
98	2048	0.413	0.483	0.104
99	2049	0.42	0.49	0.09
100	2050	0.427	0.497	0.076
101	2051	0.434	0.504	0.062
102	2052	0.441	0.511	0.048
103	2053	0.448	0.518	0.034
104	2054	0.455	0.525	0.02
105	2055	0.462	0.532	0.006
106	2056	0.469	0.531	0
107	2057	0.476	0.524	0
108	2058	0.483	0.517	0
109	2059	0.49	0.51	0
110	2060	0.497	0.503	0

## Sheet: WasteSenario3
No.	Year	Recycled	Incinerated	Discard
0	1950	0	0	1
1	1951	0	0	1
2	1952	0	0	1
3	1953	0	0	1
4	1954	0	0	1
5	1955	0	0	1
6	1956	0	0	1
7	1957	0	0	1
8	1958	0	0	1
9	1959	0	0	1
10	1960	0	0	1
11	1961	0	0	1
12	1962	0	0	1
13	1963	0	0	1
14	1964	0	0	1
15	1965	0	0	1
16	1966	0	0	1
17	1967	0	0	1
18	1968	0	0	1
19	1969	0	0	1
20	1970	0	0	1
21	1971	0	0	1
22	1972	0	0	1
23	1973	0	0	1
24	1974	0	0	1
25	1975	0	0	1
26	1976	0	0	1
27	1977	0	0	1
28	1978	0	0	1
29	1979	0	0	1
30	1980	0	0.007	0.993
31	1981	0	0.014	0.986
32	1982	0	0.021	0.979
33	1983	0	0.028	0.972
34	1984	0	0.035	0.965
35	1985	0	0.042	0.958
36	1986	0	0.049	0.951
37	1987	0	0.056	0.944
38	1988	0	0.063	0.937
39	1989	0	0.07	0.93
40	1990	0.007	0.077	0.916
41	1991	0.014	0.084	0.902
42	1992	0.021	0.091	0.888
43	1993	0.028	0.098	0.874
44	1994	0.035	0.105	0.86
45	1995	0.042	0.112	0.846
46	1996	0.049	0.119	0.832
47	1997	0.056	0.126	0.818
48	1998	0.063	0.133	0.804
49	1999	0.07	0.14	0.79
50	2000	0.077	0.147	0.776
51	2001	0.084	0.154	0.762
52	2002	0.091	0.161	0.748
53	2003	0.098	0.168	0.734
54	2004	0.105	0.175	0.72
55	2005	0.112	0.182	0.706
56	2006	0.119	0.189	0.692
57	2007	0.126	0.196	0.678
58	2008	0.133	0.203	0.664
59	2009	0.14	0.21	0.65
60	2010	0.147	0.217	0.636
61	2011	0.154	0.224	0.622
62	2012	0.161	0.231	0.608
63	2013	0.168	0.238	0.594
64	2014	0.175	0.245	0.58
65	2015	0.182	0.252	0.566
66	2016	0.189	0.259	0.552
67	2017	0.196	0.266	0.538
68	2018	0.203	0.273	0.524
69	2019	0.21	0.28	0.51
70	2020	0.217	0.287	0.496
71	2021	0.224	0.273	0.503
72	2022	0.231	0.266	0.503
73	2023	0.238	0.259	0.503
74	2024	0.245	0.252	0.503
75	2025	0.252	0.245	0.503
76	2026	0.259	0.238	0.503
77	2027	0.266	0.231	0.503
78	2028	0.273	0.224	0.503
79	2029	0.28	0.217	0.503
80	2030	0.287	0.21	0.503
81	2031	0.294	0.203	0.503
82	2032	0.301	0.196	0.503
83	2033	0.308	0.189	0.503
84	2034	0.315	0.182	0.503
85	2035	0.322	0.175	0.503
86	2036	0.329	0.168	0.503
87	2037	0.336	0.161	0.503
88	2038	0.343	0.154	0.503
89	2039	0.35	0.147	0.503
90	2040	0.357	0.14	0.503
91	2041	0.364	0.133	0.503
92	2042	0.371	0.126	0.503
93	2043	0.378	0.119	0.503
94	2044	0.385	0.112	0.503
95	2045	0.392	0.105	0.503
96	2046	0.399	0.098	0.503
97	2047	0.406	0.091	0.503
98	2048	0.413	0.084	0.503
99	2049	0.42	0.077	0.503
100	2050	0.427	0.07	0.503
101	2051	0.434	0.063	0.503
102	2052	0.441	0.056	0.503
103	2053	0.448	0.049	0.503
104	2054	0.455	0.042	0.503
105	2055	0.462	0.035	0.503
106	2056	0.469	0.028	0.503
107	2057	0.476	0.021	0.503
108	2058	0.483	0.014	0.503
109	2059	0.49	0.007	0.503
110	2060	0.497	0	0.503

## Sheet: Recycle_fate
No.	Year	Recycled	Incinerated	Discard
0	1950	0	0	0
1	1951	0	0	0
2	1952	0	0	0
3	1953	0	0	0
4	1954	0	0	0
5	1955	0	0	0
6	1956	0	0	0
7	1957	0	0	0
8	1958	0	0	0
9	1959	0	0	0
10	1960	0	0	0
11	1961	0	0	0
12	1962	0	0	0
13	1963	0	0	0
14	1964	0	0	0
15	1965	0	0	0
16	1966	0	0	0
17	1967	0	0	0
18	1968	0	0	0
19	1969	0	0	0
20	1970	0	0	0
21	1971	0	0	0
22	1972	0	0	0
23	1973	0	0	0
24	1974	0	0	0
25	1975	0	0	0
26	1976	0	0	0
27	1977	0	0	0
28	1978	0	0	0
29	1979	0	0	0
30	1980	0	0	0
31	1981	0	0	0
32	1982	0	0	0
33	1983	0	0	0
34	1984	0	0	0
35	1985	0	0	0
36	1986	0	0	0
37	1987	0	0	0
38	1988	0	0	0
39	1989	0	0	0
40	1990	0	0.007	0.993
41	1991	0	0.014	0.986
42	1992	0	0.021	0.979
43	1993	0	0.028	0.972
44	1994	0	0.035	0.965
45	1995	0	0.042	0.958
46	1996	0	0.049	0.951
47	1997	0	0.056	0.944
48	1998	0	0.063	0.937
49	1999	0	0.07	0.93
50	2000	0	0.077	0.923
51	2001	0	0.084	0.916
52	2002	0	0.091	0.909
53	2003	0	0.098	0.902
54	2004	0	0.105	0.895
55	2005	0	0.112	0.888
56	2006	0	0.119	0.881
57	2007	0	0.126	0.874
58	2008	0	0.133	0.867
59	2009	0	0.14	0.86
60	2010	0	0.147	0.853
61	2011	0	0.154	0.846
62	2012	0	0.161	0.839
63	2013	0	0.168	0.832
64	2014	0	0.175	0.825
65	2015	0	0.182	0.818
66	2016	0	0.189	0.811
67	2017	0	0.196	0.804
68	2018	0	0.203	0.797
69	2019	0	0.21	0.79
70	2020	0	0.217	0.783
71	2021	0	0.224	0.776
72	2022	0	0.231	0.769
73	2023	0	0.238	0.762
74	2024	0	0.245	0.755
75	2025	0	0.252	0.748
76	2026	0	0.259	0.741
77	2027	0	0.266	0.734
78	2028	0	0.273	0.727
79	2029	0	0.28	0.72
80	2030	0	0.287	0.713
81	2031	0	0.294	0.706
82	2032	0	0.301	0.699
83	2033	0	0.308	0.692
84	2034	0	0.315	0.685
85	2035	0	0.322	0.678
86	2036	0	0.329	0.671
87	2037	0	0.336	0.664
88	2038	0	0.343	0.657
89	2039	0	0.35	0.65
90	2040	0	0.357	0.643
91	2041	0	0.364	0.636
92	2042	0	0.371	0.629
93	2043	0	0.378	0.622
94	2044	0	0.385	0.615
95	2045	0	0.392	0.608
96	2046	0	0.399	0.601
97	2047	0	0.406	0.594
98	2048	0	0.413	0.587
99	2049	0	0.42	0.58
100	2050	0	0.427	0.573
101	2051	0	0.434	0.566
102	2052	0	0.441	0.559
103	2053	0	0.448	0.552
104	2054	0	0.455	0.545
105	2055	0	0.462	0.538
106	2056	0	0.469	0.531
107	2057	0	0.476	0.524
108	2058	0	0.483	0.517
109	2059	0	0.49	0.51
110	2060	0	0.497	0.503
