# Supplementary material for: Biobased plastic: A plausible solution to carbon neutrality in plastic industry
Source: Research Square preprint supplement (doi:10.21203/rs.3.rs-896313/v1), 2021-09-20
Supplement: Supplementary file 5 [file 8aa5e7c8cb30ac8610d0d8b8.xlsx]

## Sheet: EmissionFactor
Plastics Combustion Net Emission Factor
Material	Carbon Content (%)	Combustion Efficiency (%)	CO2 Emission (CO2E Ton)
HDPE	86	98	1.3956
LDPE, LLDPE	86	98	1.3956
PET	63	98	1.36264
PP	86	98	1.3956
PS	92	98	1.8022
PVC	38	98	0.736264
PUR	65	98	1.35
Other	80	98	1.39
Plastics CO2 Emission for Virgin Production
Material	Process Energy	Transportation Energy	Process Non- Energy	CO2 Emission (CO2E Ton)
HDPE	0.595	0.19	0.2	1.08242		1.19	0.909595	0.0904054
LDPE, LLDPE	0.7	0.19	0.21	1.20879		1.4	0.863422	0.136578
PET	0.875	0.11	0.39	1.51099		1.75	0.863422	0.136578
PP	0.585	0.17	0.21	1.06044		1.17	0.906359	0.0936414
PS	0.935	0.18	0.45	1.71978		1.87	0.919669	0.0803314
PVC	0.845	0.12	0.14	1.21429		1.69	0.718512	0.281488
PUR	0.875	0.11	0.39	1.51099		1.75	0.863422	0.136578
Other	0.875	0.11	0.39	1.51099		1.75	0.863422	0.136578
Plastics CO2 Emission for Recycled Production
Material	Process Energy	Transportation Energy	Process Non- Energy	CO2 Emission (CO2E Ton)
HDPE	0.175	0.19	0	0.401099		0.35
LDPE	-	-	-	-
PET	0.385	0.21	0	0.653846		0.77
LLDPE	-	-	-	-
PP	-	-	-	-
PS	-	-	-	-
PVC	-	-	-	-
PUR	-	-	-	-
Plastics CO2 Emission for Landfill
Material	Process Energy	Transportation Energy	Process Non- Energy	CO2 Emission (CO2E Ton)
HDPE	0	0.04	0	0.043956
LDPE	0	0.04	0	0.043956
PET	0	0.04	0	0.043956
LLDPE	0	0.04	0	0.043956
PP	0	0.04	0	0.043956
PS	0	0.04	0	0.043956
PVC	0	0.04	0	0.043956
PUR	0	0.04	0	0.043956

## Sheet: PlasticType
Market Sector	LDPE, LLDPE	HDPE	PP	PS	PVC	PET	PUR	Other	Total
Transportation	0.00085	0.006375	0.0221	8.5e-05	0.00289	8.5e-05	0.013175	0.0119	0.05746
Packaging	0.11475	0.07905	0.0697	0.01955	0.00765	0.08585	0.0017	0.00085	0.3791
Building and Construction	0.00935	0.02805	0.0102	0.0187	0.06885	8.5e-05	0.0204	0.00391	0.159545
Electrical/Electronic	0.00425	0.001445	0.00731	0.00493	0.00306	8.5e-05	0.00306	0.0085	0.03264
Consumer & Institutional Products	0.02465	0.01445	0.0323	0.0153	0.00459	8.5e-05	0.0085	0.00136	0.101235
Industrial Machinery	0.00153	0.00085	0.1516	8.5e-05	8.5e-05	8.5e-05	0.002465	8.5e-05	0.156785
Other	0.01445	0.00765	0.0357	0.006205	0.0119	8.5e-05	0.02159	0.014535	0.112115
Total	0.16983	0.13787	0.32891	0.064855	0.099025	0.08636	0.07089	0.04114	0.99888

## Sheet: Lifetime
Market Sector	Mean	SD
Transportation	13	3
Packaging	0.5	0.1
Building and Construction	35	4
Electrical/Electronic	8	2
Consumer & Institutional Products	3	1
Industrial Machinery	20	3
Other	5	1.5

## Sheet: WasteSenario1
No.	Year	Recycled	Incinerated	Discard
0	1950	0	0	1
1	1951	0	0	1
2	1952	0	0	1
3	1953	0	0	1
4	1954	0	0	1
5	1955	0	0	1
6	1956	0	0	1
7	1957	0	0	1
8	1958	0	0	1
9	1959	0	0	1
10	1960	0	0	1
11	1961	0	0	1
12	1962	0	0	1
13	1963	0	0	1
14	1964	0	0	1
15	1965	0	0	1
16	1966	0	0	1
17	1967	0	0	1
18	1968	0	0	1
19	1969	0	0	1
20	1970	0	0	1
21	1971	0	0	1
22	1972	0	0	1
23	1973	0	0	1
24	1974	0	0	1
25	1975	0	0	1
26	1976	0	0	1
27	1977	0	0	1
28	1978	0	0	1
29	1979	0	0	1
30	1980	0	0.007	0.993
31	1981	0	0.014	0.986
32	1982	0	0.021	0.979
33	1983	0	0.028	0.972
34	1984	0	0.035	0.965
35	1985	0	0.042	0.958
36	1986	0	0.049	0.951
37	1987	0	0.056	0.944
38	1988	0	0.063	0.937
39	1989	0	0.07	0.93
40	1990	0.007	0.077	0.916
41	1991	0.014	0.084	0.902
42	1992	0.021	0.091	0.888
43	1993	0.028	0.098	0.874
44	1994	0.035	0.105	0.86
45	1995	0.042	0.112	0.846
46	1996	0.049	0.119	0.832
47	1997	0.056	0.126	0.818
48	1998	0.063	0.133	0.804
49	1999	0.07	0.14	0.79
50	2000	0.077	0.147	0.776
51	2001	0.084	0.154	0.762
52	2002	0.091	0.161	0.748
53	2003	0.098	0.168	0.734
54	2004	0.105	0.175	0.72
55	2005	0.112	0.182	0.706
56	2006	0.119	0.189	0.692
57	2007	0.126	0.196	0.678
58	2008	0.133	0.203	0.664
59	2009	0.14	0.21	0.65
60	2010	0.147	0.217	0.636
61	2011	0.154	0.224	0.622
62	2012	0.161	0.231	0.608
63	2013	0.168	0.238	0.594
64	2014	0.175	0.245	0.58
65	2015	0.182	0.252	0.566
66	2016	0.189	0.259	0.552
67	2017	0.196	0.266	0.538
68	2018	0.203	0.273	0.524
69	2019	0.21	0.28	0.51
70	2020	0.217	0.287	0.496
71	2021	0.224	0.294	0.482
72	2022	0.231	0.301	0.468
73	2023	0.238	0.308	0.454
74	2024	0.245	0.315	0.44
75	2025	0.252	0.322	0.426
76	2026	0.259	0.329	0.412
77	2027	0.266	0.336	0.398
78	2028	0.273	0.343	0.384
79	2029	0.28	0.35	0.37
80	2030	0.287	0.357	0.356
81	2031	0.294	0.364	0.342
82	2032	0.301	0.371	0.328
83	2033	0.308	0.378	0.314
84	2034	0.315	0.385	0.3
85	2035	0.322	0.392	0.286
86	2036	0.329	0.399	0.272
87	2037	0.336	0.406	0.258
88	2038	0.343	0.413	0.244
89	2039	0.35	0.42	0.23
90	2040	0.357	0.427	0.216
91	2041	0.364	0.434	0.202
92	2042	0.371	0.441	0.188
93	2043	0.378	0.448	0.174
94	2044	0.385	0.455	0.16
95	2045	0.392	0.462	0.146
96	2046	0.399	0.469	0.132
97	2047	0.406	0.476	0.118
98	2048	0.413	0.483	0.104
99	2049	0.42	0.49	0.09
100	2050	0.427	0.497	0.076
101	2051	0.434	0.504	0.062
102	2052	0.441	0.511	0.048
103	2053	0.448	0.518	0.034
104	2054	0.455	0.525	0.02
105	2055	0.462	0.532	0.006
106	2056	0.469	0.531	0
107	2057	0.476	0.524	0
108	2058	0.483	0.517	0
109	2059	0.49	0.51	0
110	2060	0.497	0.503	0

## Sheet: WasteSenario2
No.	Year	Recycled	Incinerated	Discard
0	1950	0	0	1
1	1951	0	0	1
2	1952	0	0	1
3	1953	0	0	1
4	1954	0	0	1
5	1955	0	0	1
6	1956	0	0	1
7	1957	0	0	1
8	1958	0	0	1
9	1959	0	0	1
10	1960	0	0	1
11	1961	0	0	1
12	1962	0	0	1
13	1963	0	0	1
14	1964	0	0	1
15	1965	0	0	1
16	1966	0	0	1
17	1967	0	0	1
18	1968	0	0	1
19	1969	0	0	1
20	1970	0	0	1
21	1971	0	0	1
22	1972	0	0	1
23	1973	0	0	1
24	1974	0	0	1
25	1975	0	0	1
26	1976	0	0	1
27	1977	0	0	1
28	1978	0	0	1
29	1979	0	0	1
30	1980	0	0.007	0.993
31	1981	0	0.014	0.986
32	1982	0	0.021	0.979
33	1983	0	0.028	0.972
34	1984	0	0.035	0.965
35	1985	0	0.042	0.958
36	1986	0	0.049	0.951
37	1987	0	0.056	0.944
38	1988	0	0.063	0.937
39	1989	0	0.07	0.93
40	1990	0.007	0.077	0.916
41	1991	0.014	0.084	0.902
42	1992	0.021	0.091	0.888
43	1993	0.028	0.098	0.874
44	1994	0.035	0.105	0.86
45	1995	0.042	0.112	0.846
46	1996	0.049	0.119	0.832
47	1997	0.056	0.126	0.818
48	1998	0.063	0.133	0.804
49	1999	0.07	0.14	0.79
50	2000	0.077	0.147	0.776
51	2001	0.084	0.154	0.762
52	2002	0.091	0.161	0.748
53	2003	0.098	0.168	0.734
54	2004	0.105	0.175	0.72
55	2005	0.112	0.182	0.706
56	2006	0.119	0.189	0.692
57	2007	0.126	0.196	0.678
58	2008	0.133	0.203	0.664
59	2009	0.14	0.21	0.65
60	2010	0.147	0.217	0.636
61	2011	0.154	0.224	0.622
62	2012	0.161	0.231	0.608
63	2013	0.168	0.238	0.594
64	2014	0.175	0.245	0.58
65	2015	0.182	0.252	0.566
66	2016	0.189	0.259	0.552
67	2017	0.196	0.266	0.538
68	2018	0.203	0.273	0.524
69	2019	0.21	0.28	0.51
70	2020	0.217	0.287	0.496
71	2021	0.224	0.294	0.482
72	2022	0.231	0.301	0.468
73	2023	0.238	0.308	0.454
74	2024	0.245	0.315	0.44
75	2025	0.252	0.322	0.426
76	2026	0.259	0.329	0.412
77	2027	0.266	0.336	0.398
78	2028	0.273	0.343	0.384
79	2029	0.28	0.35	0.37
80	2030	0.287	0.357	0.356
81	2031	0.294	0.364	0.342
82	2032	0.301	0.371	0.328
83	2033	0.308	0.378	0.314
84	2034	0.315	0.385	0.3
85	2035	0.322	0.392	0.286
86	2036	0.329	0.399	0.272
87	2037	0.336	0.406	0.258
88	2038	0.343	0.413	0.244
89	2039	0.35	0.42	0.23
90	2040	0.357	0.427	0.216
91	2041	0.364	0.434	0.202
92	2042	0.371	0.441	0.188
93	2043	0.378	0.448	0.174
94	2044	0.385	0.455	0.16
95	2045	0.392	0.462	0.146
96	2046	0.399	0.469	0.132
97	2047	0.406	0.476	0.118
98	2048	0.413	0.483	0.104
99	2049	0.42	0.49	0.09
100	2050	0.427	0.497	0.076
101	2051	0.434	0.504	0.062
102	2052	0.441	0.511	0.048
103	2053	0.448	0.518	0.034
104	2054	0.455	0.525	0.02
105	2055	0.462	0.532	0.006
106	2056	0.469	0.531	0
107	2057	0.476	0.524	0
108	2058	0.483	0.517	0
109	2059	0.49	0.51	0
110	2060	0.497	0.503	0
