# Supplementary material for: Biobased plastic: A plausible solution to carbon neutrality in plastic industry
Source: Research Square preprint supplement (doi:10.21203/rs.3.rs-896313/v1), 2021-09-20
Supplement: Supplementary file 6 [file acfa7b2366650ccffbe3af0f.xlsx]

## Sheet: Sheet1
Plastic Production from 1950-2019
Year	nth year	Global Production (MT)	Low Recycling Ratio	High Recycling Ratio
1950	1	2	1.0672	1.0672
1951	2	2	1.6564	1.6564
1952	3	2	2.3218	2.3218
1953	4	3	3.0676	3.0676
1954	5	3	3.898	3.898
1955	6	4	4.8172	4.8172
1956	7	5	5.8294	5.8294
1957	8	5	6.9388	6.9388
1958	9	6	8.1496	8.1496
1959	10	7	9.466	9.466
1960	11	8	10.8922	10.8922
1961	12	9	12.4324	12.4324
1962	13	11	14.0908	14.0908
1963	14	13	15.8716	15.8716
1964	15	15	17.779	17.779
1965	16	17	19.8172	19.8172
1966	17	20	21.9904	21.9904
1967	18	23	24.3028	24.3028
1968	19	27	26.7586	26.7586
1969	20	32	29.362	29.362
1970	21	35	32.1172	32.1172
1971	22	38	35.0284	35.0284
1972	23	44	38.0998	38.0998
1973	24	51	41.3356	41.3356
1974	25	52	44.74	44.74
1975	26	46	48.3172	48.3172
1976	27	54	52.0714	52.0714
1977	28	59	56.0068	56.0068
1978	29	64	60.1276	60.1276
1979	30	91	64.438	64.438
1980	31	70	68.9422	68.9422
1981	32	72	73.6444	73.6444
1982	33	73	78.5488	78.5488
1983	34	80	83.6596	83.6596
1984	35	86	88.981	88.981
1985	36	90	94.5172	94.5172
1986	37	96	100.272	100.272
1987	38	104	106.251	106.251
1988	39	110	112.457	112.457
1989	40	114	118.894	118.894
1990	41	120	125.567	125.567
1991	42	124	132.48	132.48
1992	43	132	139.638	139.638
1993	44	137	147.044	147.044
1994	45	151	154.702	154.702
1995	46	156	162.617	162.617
1996	47	168	170.793	170.793
1997	48	180	179.235	179.235
1998	49	188	187.946	187.946
1999	50	202	196.93	196.93
2000	51	213	206.192	206.192
2001	52	218	215.736	215.736
2002	53	231	225.567	225.567
2003	54	241	235.688	235.688
2004	55	256	246.103	246.103
2005	56	263	256.817	256.817
2006	57	280	267.834	267.834
2007	58	298	279.159	279.159
2008	59	281	290.795	290.795
2009	60	288	302.746	302.746
2010	61	313	315.017	315.017
2011	62	325	327.612	327.612
2012	63	338	340.536	340.536
2013	64	352	353.792	353.792
2014	65	367	367.384	367.384
2015	66	381	381.317	381.317
2016	67	395.595	395.595	395.595
2017	68	410.223	410.223	410.223
2018	69	425.204	425.204	425.204
2019	70	440.542	440.542	440.542
2020	71		456.242	450.489
2021	72		472.308	460.499
2022	73		488.745	470.732
2023	74		505.556	481.19
2024	75		522.745	491.875
2025	76		540.317	502.79
2026	77		558.276	513.938
2027	78		576.627	525.321
2028	79		595.373	536.941
2029	80		614.518	548.8
2030	81		634.067	560.901
2031	82		654.024	573.247
2032	83		674.394	585.84
2033	84		695.18	598.682
2034	85		716.386	611.775
2035	86		738.017	625.122
2036	87		760.077	638.726
2037	88		782.571	652.589
2038	89		805.502	666.713
2039	90		828.874	681.1
2040	91		852.692	695.753
2041	92		876.96	710.675
2042	93		901.683	725.868
2043	94		926.864	741.334
2044	95		952.507	757.075
2045	96		978.617	773.094
2046	97		1005.2	789.394
2047	98		1032.25	805.977
2048	99		1059.79	822.845
2049	100		1087.81	840
2050	101		1116.32	857.445
2051	102		1145.32	875.183
2052	103		1174.81	893.216
2053	104		1204.81	911.546
2054	105		1235.31	930.175
2055	106		1266.32	949.106
2056	107		1297.84	968.342
2057	108		1329.88	987.885
2058	109		1362.44	1007.74
2059	110		1395.53	1027.9
2060	111		1429.14	1048.38
